# Supplementary material for: Immunogenomic Identification for Predicting the Prognosis of Cervical Cancer Patients
Source: PubMed Central journal article supplement (PMC7957482; doi:10.3390/ijms22052442), 2021-02-28
Supplement: ijms-22-02442-s001.pdf [file ijms-22-02442-s001.pdf]

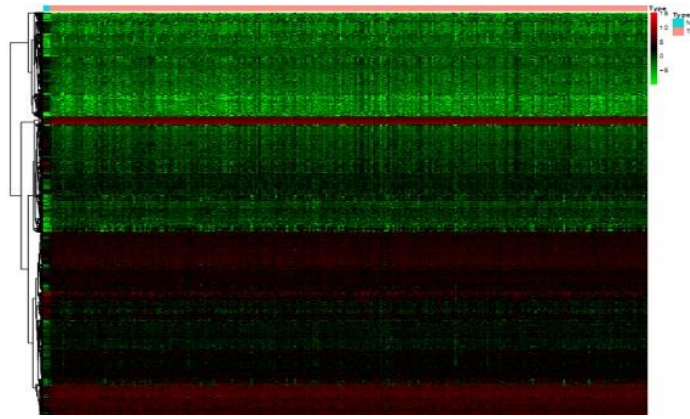

(a)

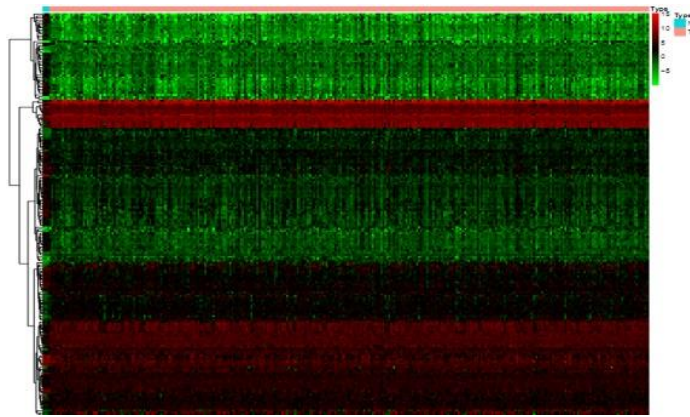

(b)

**Figure S1:** (a) heatmap of DEGs between primary cervical cancer and para-tumor tissues. (b) heatmap of differentially expressed IRGs.

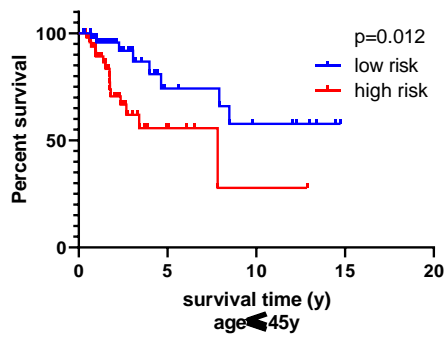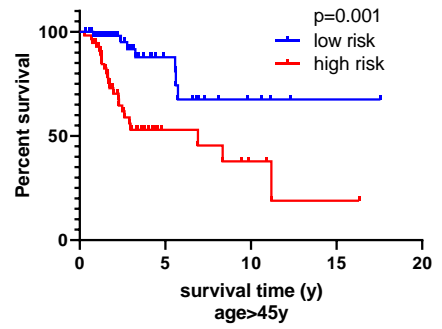

(a)

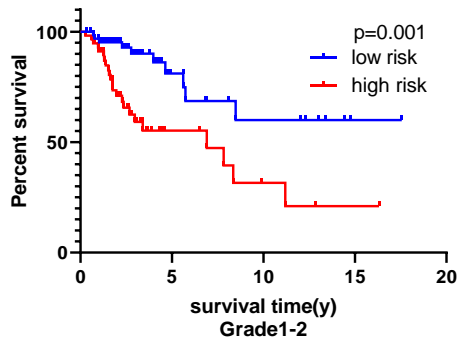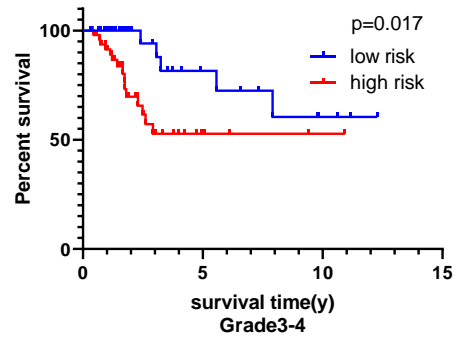

(b)

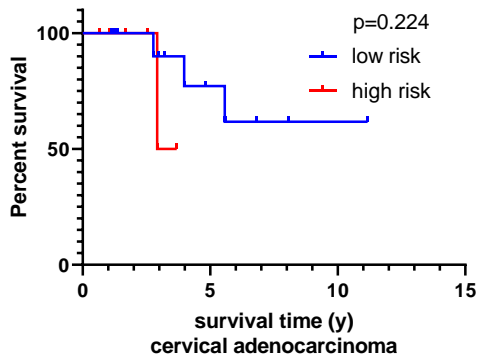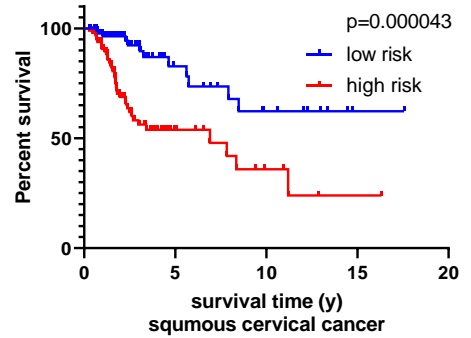

(c)

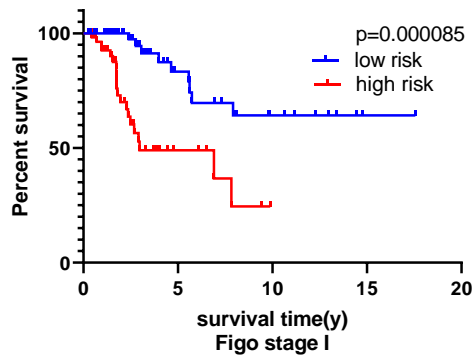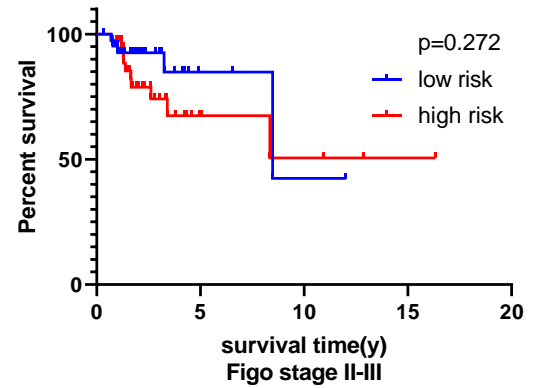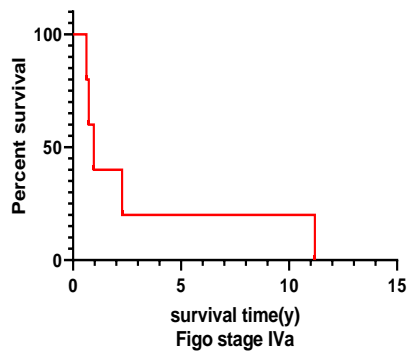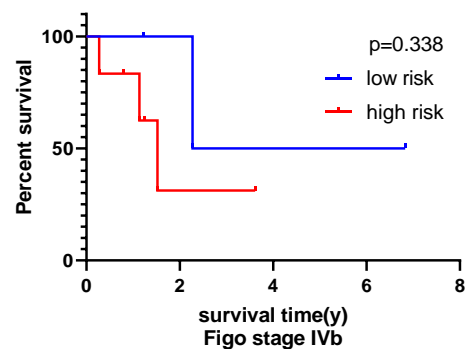

(d)

**Figure S2.** Verifying the efficacy of the prognostic model. (abcd) The stratification of TCGA cervical cancer patients into various prognosis groups in distinct age groups ( $\leq 45$  years, and  $>45$  years), grade (1&2, 3&4), histological type (squamous cancer, adenocarcinoma), and FIGO stages (I, II-III, IVa, IVb),

respectively. Blue represents low risk group; red represents high risk group.
